# Supplementary material for: A Randomized Clinical Trial of a Money Management Intervention for Veterans With Psychiatric Disabilities
Source: Atypon-hosted journal article supplement (doi:10.1176/appi.ps.201500203), 2016-05-16
Supplement: appi.ps.201500203.ds001.pdf [file appi.ps.201500203.ds001.pdf]

Appendix Table 1. Characteristics of Sample (N=144)

|                                         | N   | M (SD) or % |
|-----------------------------------------|-----|-------------|
| <i>Demographics</i>                     |     |             |
| Age (years)                             |     | 52.6 (10.3) |
| Male                                    | 117 | 81          |
| Non-white                               | 107 | 74          |
| Married                                 | 49  | 35          |
| Post High School Education              | 103 | 74          |
| <i>Clinical</i>                         |     |             |
| Psychotic Disorder                      | 24  | 17          |
| Bipolar Disorder                        | 10  | 7           |
| Depressive Disorder                     | 63  | 44          |
| Posttraumatic Stress Disorder           | 72  | 50          |
| Brief Psychiatric Rating Scale (0-126)  |     | 36.1 (10.6) |
| Montreal Cognitive Assessment (0-30)    |     | 22.3 (4.4)  |
| <i>Financial</i>                        |     |             |
| Disability Benefits VA Only             | 64  | 44          |
| Disability Benefits SSA Only            | 24  | 17          |
| Disability Benefits VA+SSA              | 56  | 39          |
| Annual Income Less than \$14,999        | 37  | 27          |
| Annual Income between \$15,000-\$49,999 | 68  | 50          |
| Annual Income over \$50,000             | 31  | 23          |
| Personal Savings of \$0                 | 46  | 45          |
| Personal Savings \$1-\$1000             | 38  | 37          |
| Personal Savings over \$1000            | 19  | 18          |
| Personal Debt of \$0                    | 40  | 33          |
| Personal Debt \$1-\$1000                | 20  | 17          |
| Personal Debt over \$1000               | 60  | 40          |
| Seeking Work                            | 73  | 51          |
| Working at Least Part Time              | 23  | 16          |
| Engaged in Any Vocational Activity      | 84  | 58          |
| Homeless in Past Six Months             | 12  | 8           |

Appendix Table 2. Use of \$AFE Skills Reported at Six Month Follow-up by Veterans with Psychiatric Disabilities who completed Money Management Intervention (N=49)

| Because of the intervention, have you...                 | n  | %  |
|----------------------------------------------------------|----|----|
| written a budget                                         | 27 | 55 |
| eaten out less                                           | 29 | 59 |
| used a coin jar                                          | 30 | 61 |
| used coupons                                             | 24 | 49 |
| saved on utilities                                       | 27 | 55 |
| used Veteran's specific benefits                         | 25 | 51 |
| cleaned your thermostat or coils on the refrigerator     | 16 | 33 |
| changed the temperature of your thermostat to save money | 26 | 53 |
| looked for work                                          | 15 | 31 |
| lowered your utility bills                               | 24 | 49 |
|                                                          |    |    |
| No \$AFE Skills Used                                     | 9  | 18 |
| 1-3 \$AFE Skills Used                                    | 7  | 14 |
| 4-6 \$AFE Skills Used                                    | 12 | 24 |
| 7+ \$AFE Skills Used                                     | 21 | 43 |

Appendix Table 3. Money Knowledge Items

I will now read some statements to you and after each statement, please tell me whether it is true or false.

1. If you work through VA work therapy, you will lose your VA disability benefits.  
(FALSE)
2. If you work through community vocational rehabilitation, you will lose your SS benefits. (FALSE)
3. A payee or fiduciary is assigned if a Veteran receiving disability is unable to take care of his/her benefits. (TRUE)
4. You are not allowed to work if you are 100% service connected. (FALSE)
5. You will definitely have more money if you work while receiving disability.  
(TRUE)
6. A Veteran receiving disability needs to go to the local SSA office or VA in order to talk with someone about benefits. (FALSE)
7. After a payee or fiduciary is assigned, it remains in place as long as a Veteran is getting disability funds. (FALSE)
8. A budget is a plan where you list your monthly income and expenses. (TRUE)
9. If you have a credit card, it is best to just pay your minimum payment. (FALSE)
10. You can get up to 20% off your cell phone bill since you are a Veteran. (TRUE)
